# Supplementary material
Source: MDPI journal article supplement (https://www.mdpi.com/2076-3417/11/8/3486)

# 4-Hexylresorcinol inhibits Class I histone deacetylases in human umbilical cord endothelial cells

Jwa-Young Kim<sup>1</sup>, HaeYong Kweon<sup>2</sup>, Dae-Won Kim<sup>3</sup>, Je-Yong Choi<sup>4</sup>, and Seong-Gon Kim<sup>5,\*</sup>

<sup>1</sup> Hallym University Kangnam Sacred Heart Hospital, Hallym University Medical Center, 1, Singil-ro, Yeongdeungpo-gu, Seoul 07441, Republic of Korea; jwayoung@hanmail.net

<sup>2</sup> Sericultural and Apicultural Division, National Institute of Agricultural Science, Rural Development Administration, Wanju 55365, Republic of Korea; hykweon@korea.kr (K.H.Y.)

<sup>3</sup> Dept. of Oral Biochemistry, College of Dentistry, Gangneung-Wonju National University, Gangneung 28644, Republic of Korea; [kimdw@gwnu.ac.kr](mailto:kimdw@gwnu.ac.kr)

<sup>4</sup> School of Biochemistry and Cell Biology, Cell and Matrix Research Institute, Skeletal Diseases Analysis Center, Korea Mouse Phenotyping Center (KMPC), School of Medicine, Kyungpook National University, Daegu 41944, Republic of Korea; [jechoi@knu.ac.kr](mailto:jechoi@knu.ac.kr)

<sup>5</sup> Dept. of Oral and Maxillofacial Surgery, College of Dentistry, Gangneung-Wonju National University, Gangneung 28644, Republic of Korea

\*Correspondence: [kimsg@gwnu.ac.kr](mailto:kimsg@gwnu.ac.kr); Tel.: +82-33-640-2468 (K.S.G.)

Received: date; Accepted: date; Published: date

## Supplementary Figure 1. Relative Expressions of histone deacetylase (HDAC) after 4-hexylresorcinol administration.

The densitometric measurements of Figure 1a. The administration of 4HR decreased the expression of HDACs in HUVECs.

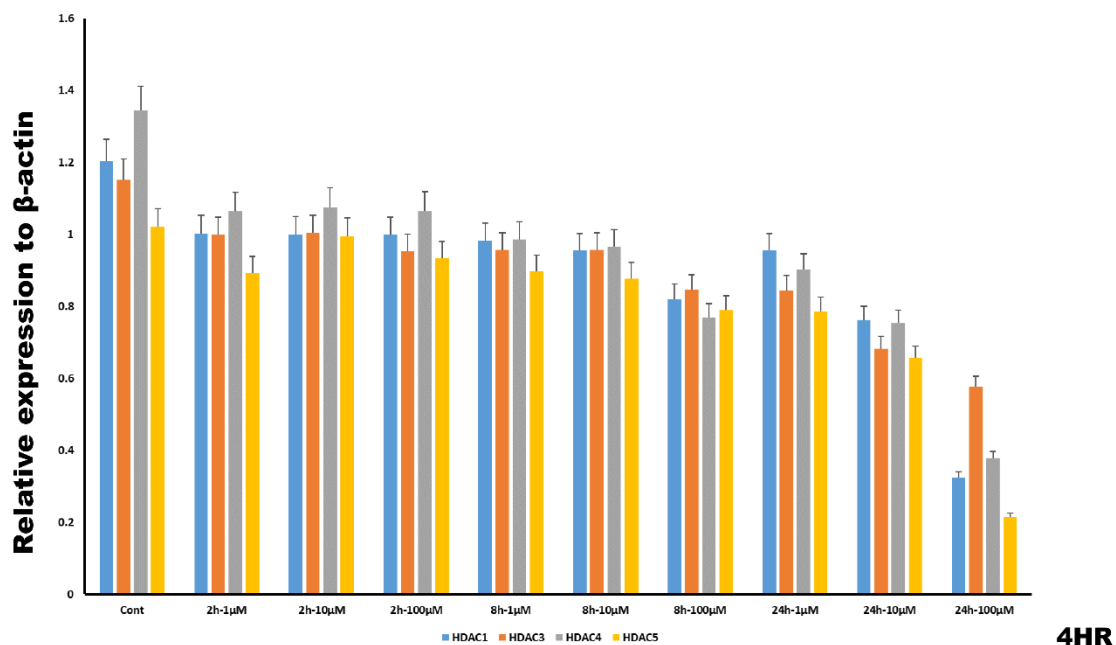

**Supplementary Figure 2. Relative Expressions of acetylated lysine after 4-hexylresorcinol administration.**

The densitometric measurements of Figure 1b. The administration of 4HR increased the expression of acetylated lysine in HUVECs.

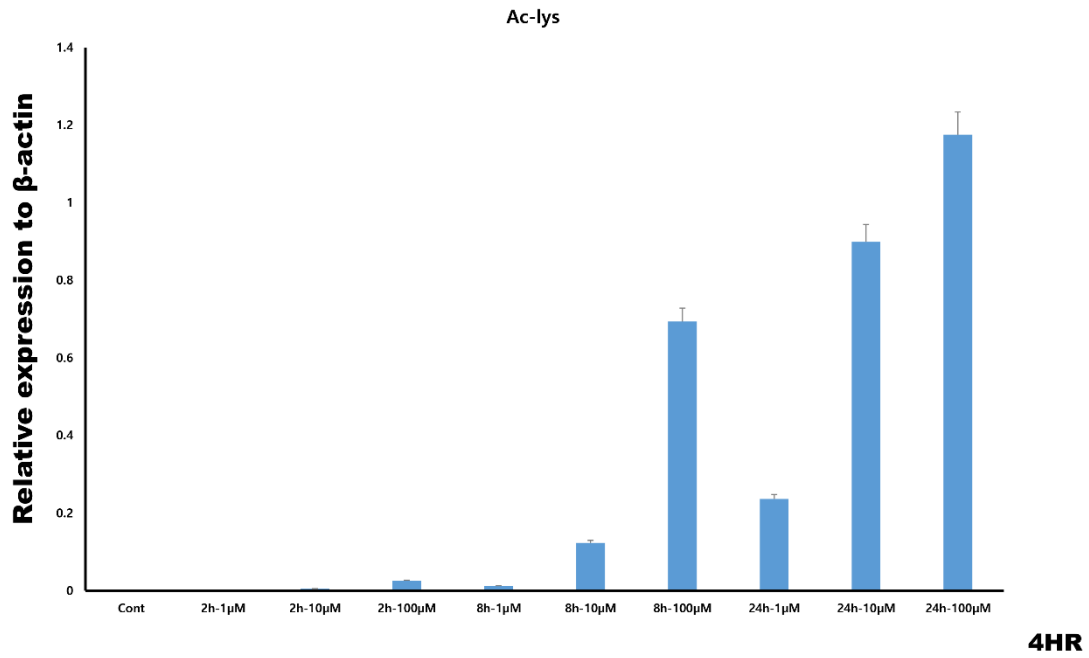

Supplement: s1 [file s1]
